# Supplementary material for: Enhancing nursing education: An AI-powered Chatbots for fostering engagement and higher-order thinking skills
Source: Research Square preprint supplement (doi:10.21203/rs.3.rs-6372448/v1), 2025-05-08
Supplement: Supplementary file 1 [file 21fd6b59b45da0f839fad343.docx]

**Research Questionnaire**
**Introduction**
Thank you for participating in this study. This research aims to explore key factors that influence of ChatBots in your nursing education. Your responses will remain confidential and will be used solely for research purposes. The questionnaire should take approximately 10-15 minutes to complete. Please indicate the extent to which you agree or disagree with each statement using the scale provided.

**Demographic Information**

1.Age: ________

2.Gender: [ ] Male [ ] Female [ ] Other [ ] Prefer not to say

3.Education Level:
[ ] Junior College [ ] Undergraduate [ ] Postgraduate [ ] Other: _________

**Instructions**
For each statement below, please indicate your level of agreement on a scale of 1 to 7:
• 1 = Strongly Disagree

• 2 = Disagree

• 3 = Somewhat Disagree

• 4 = Neutral

• 5 = Somewhat Agree

• 6 = Agree

• 7 = Strongly Agree

**Section 1: Perceived Usefulness (PUC)**

1.Using the system enhances my productivity.

2.The system helps me achieve tasks more effectively.

3.Overall, the system is helpful for my needs.

**Section 2: Ease of Use (EoU)**
4. The system is easy to use.

5. Learning how to use the system is simple.

6. I find navigating the system straightforward.

7. I can quickly recover from errors when using the system.

8. The layout and design of the system make it easy to locate information.

**Section 3: Engagement (ENG)**

9. I feel energised and motivated while engaging in tasks.

10. I put effort into completing activities thoroughly.

11. I actively participate in discussions or activities.

12. I enjoy the process of learning and exploring new concepts.

13. I stay focused and avoid distractions when working on tasks.

**Section 4: Feedback Quality (FBQ)**

14. The feedback I receive is specific and actionable.

15. Feedback is provided promptly.

16. Feedback highlights both strengths and areas for improvement.

17. Feedback is provided consistently throughout the process, not just at the end.

**Section 5: Self-Regulated Learning (SRL)**

18. I set specific goals for my learning activities.

19. I develop a clear plan before starting a learning task.

20. I regularly track my progress toward learning goals.

21. I use a variety of strategies to overcome challenges while learning.

22. I reflect on past learning experiences to improve future performance.

**Section 6: Higher-Order Thinking Skills (HOTS)**

23. I analyse problems by breaking them into smaller components.

24. I evaluate information critically to assess its validity.

25. I create new ideas or solutions by synthesising concepts.

26. I design innovative strategies or methods to address complex problems.

27. I regularly question assumptions to explore alternative perspectives.

28. I draw logical conclusions based on the evidence available.

29. I identify relationships between ideas to form a deeper understanding of concepts.

30. I synthesise information from multiple sources to create new insights.
